# Supplementary material
Source: publisher figshare collection journal article supplement (https://springernature.figshare.com/ndownloader/files/14088944)
Supplement: Supplementary file [file 14088944]

## Additional file 1

**The GPP model uses a logarithm link function to link the non-zero off-diagonal elements of the  $61 \times 61$  instantaneous rate matrix to a linear model format.**

The basic idea is to use a link function to link the non-zero parameters in the instantaneous rate matrix to a linear model format — the same idea as used in generalized linear models. We choose to use a logarithm as the link function for the following reasons:

- It is a simple function that maps positive numbers to arbitrary real values, which takes away the constraints on the parameters in estimation.
- The log transformation works best for finding a parametric representation of the empirical codon model rate matrix.
- Existing models use a multiplicative form for elements of the Q matrix, which is converted to our additive framework via the log function.

The R matrix is constructed from the set of parameters  $\beta_0, \dots, \beta_p$ , whose values can be any real number, or  $-\infty$ , as follows:

To each  $\beta_i$  there is a corresponding symmetric  $61 \times 61$  matrix  $X^{(i)}$  (in fact, the diagonal elements of this matrix are not important). Now for  $j \neq k$ , we define  $r_{jk}$  by  $\log(r_{jk}) = \sum_i \beta_i (X^{(i)})_{jk}$ . The diagonal elements of the R-matrix are then given by the equations  $\sum_{j=1}^{61} \pi_r \pi_{ij} = 0$  for each  $i$  (so  $r_{ii} = \frac{\sum_{j \neq i} \pi_j r_{ij}}{\pi_i}$ ). This parameterization ensures that the off-diagonal  $\pi_i$  elements of the R matrix are non-negative.

The matrices  $X^{(i)}$  represent important factors for the instantaneous substitution rates. As an example, if we have only a single parameter  $\beta_0$  with corresponding matrix  $X^{(0)}$  all of whose off-diagonal elements are 1, then our parameterization gives that  $r_{ij} = e^{\beta_0}$  for every  $i \neq j$ . In order to allow the interpretation of branch lengths as expected number of substitutions per site, we require that  $\sum_{i=1}^{61} \pi_i q_{ii} = -1$ . In terms of the R matrix, this says  $\sum_{i=1}^{61} \pi_i^2 r_{ii} = 1$ , and using the formula for  $r_{ii}$  in terms of  $r_{ij}$  for  $j \neq i$ , we get  $\sum_{i \neq j} \pi_i \pi_j r_{ij} = 1$ . This means that for a single-parameter model, we are obliged to choose  $\beta_0$  so that  $e^{\beta_0} \sum_{i \neq j} \pi_i \pi_j =$

1. That is,  $e^{\beta_0} = \frac{1}{1 - \sum_{i=1}^{61} \pi_i^2}$ . For a parameterization with more parameters, there is still a unique value for  $\beta_0$  which will give the  $R$  matrix the required property. We will therefore always take  $X^{(0)}$  to be the matrix all of whose off-diagonal elements are 1, and always chose  $\beta_0$  so that the scaling requirement for the  $R$  matrix is satisfied. When this framework is extended to mixture models, there will be a  $\beta_0$  coefficient for each component of the mixture, and the scaling restriction on the  $R$  matrix will only impose a single linear equation on all these  $\beta_0$ . The effect of this  $\beta_0$  parameter on the likelihood is exactly the same as multiplying all branch lengths by a constant.
